# Supplementary material
Source: ML conference proceedings conference paper supplement (https://proceedings.neurips.cc/paper_files/paper/2015/hash/d2ddea18f00665ce8623e36bd4e3c7c5-Abstract.html)

# Cost for Setting C

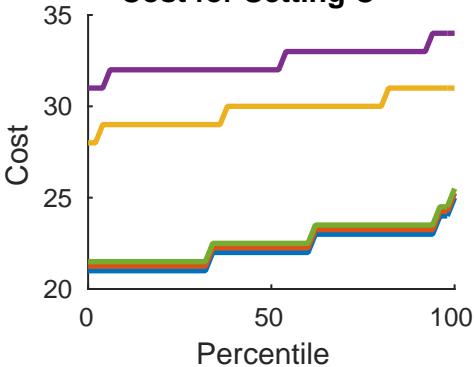

Supplement: Supplementary file [file d2ddea18f00665ce8623e36bd4e3c7c5-Supplemental.zip]
